# Supplementary material
Source: PubMed Central journal article supplement (PMC3340286)
Supplement: supp_M111.329268_jbc.M111.329268-1.pdf [file supp_M111.329268_jbc.M111.329268-1.pdf]

## Supplemental Figures and Legends

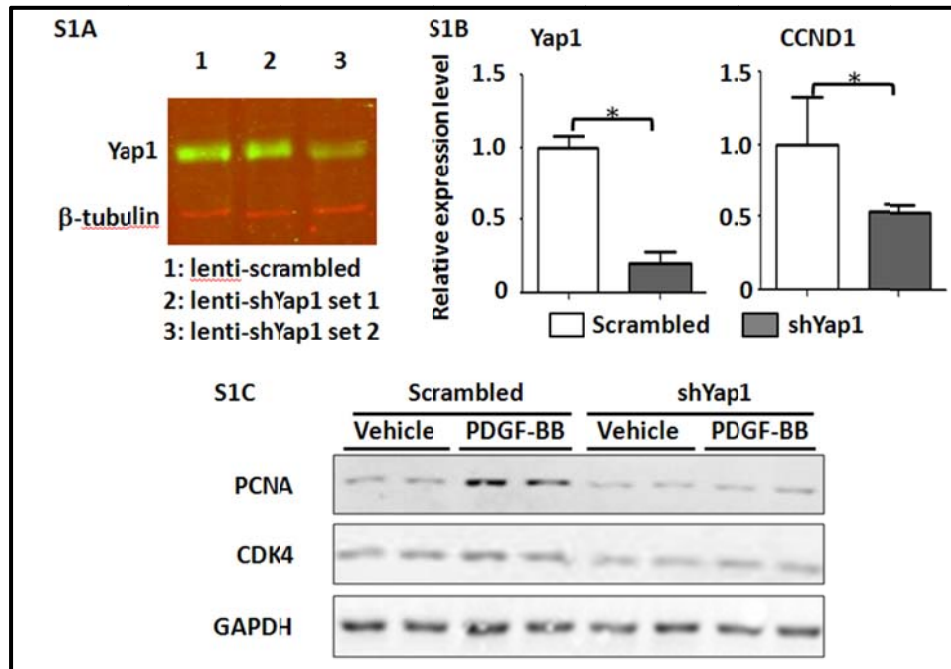

**Supplemental Figure S1. Knockdown of Yap1.** **S1A.** RASMCs were infected with two sets of lentiviruses carrying Yap1 shRNA targeting different Yap1 mRNA sequences, separately. The knockdown efficiency was confirmed by Western blotting for Yap1 (Green).  $\beta$ -tubulin served as internal control (Red). **S1B.** RASMCs after being infected with lentiviruses as described in the methods were harvested for qRT-PCR to detect gene expression as indicated. 18S served as internal control. Data is expressed as mean  $\pm$  SD. N=3. \*  $p < 0.05$ . **S1C.** Representative Western blot analysis of total protein lysates. Scrambled and shYap1 RASMCs after being subjected to serum starvation for 48hrs were treated with 10ng/ml PDGF-BB or vehicle respectively for 24hrs and harvested for Western blot analysis as indicated.

### Supplemental Table S1: Primers Used for qRT-PCR and ChIP assay

| Gene              | Primer Sequence                                                                               | Sequence ID  |
|-------------------|-----------------------------------------------------------------------------------------------|--------------|
| 18S RNA           | forward: 5'-ggaagggcaccaccaggagt-3'<br>reverse: 5'-tgcagccccggacatctaag-3'                    | NR_003278    |
| MyoCD             | forward: 5'-gggcccagcattttcaacat-3'<br>reverse: 5'-tccccatttttctcccctttat-3'                  | NM_182667    |
| SRF               | forward: 5'-ccggaggagggtgtgattc-3'<br>reverse: 5'-acacccccagagccacttagg-3'                    | NM_001109302 |
| SMA               | forward: 5'-accctcttcagccatctttca-3'<br>reverse: 5'-gcgttctggaggagcaataatc-3'                 | NM_031004    |
| SMMHC             | forward: 5'-atgctgggaaggtggactacaa-3'<br>reverse: 5'-tgtgcagggctgtggttga-3'                   | NM_001170600 |
| Smoothelin B      | forward: 5'-aaggccatgattgagaaacta-3'<br>reverse: 5'-gcaccagggcacagaaag-3'                     | NM_001013049 |
| SM22a             | forward: 5'-cggcagatcatcagttagaaag-3'<br>reverse: 5'-gggctgaggctgaggataggt-3'                 | NM_031549    |
| Yap1              | Forward:5'- tcggcaggcaatacgaata-3'<br>Reverse:5'- catgctgaggccactgtctgt-3'                    | NM_001034002 |
| CCND1             | Forward:5'-attgcggctggctttacattag-3'<br>Reverse:5'-gccttcatttgatctgggacat-3'                  | NM_171992    |
| CCND2             | Forward:5'-gtgcgggatgttgacctgt-3'<br>Reverse:5'-aactatatggcctttcctctc-3'                      | NM_022267    |
| SMA ChIP          | Forward:5'-agcagaacagaggaatgcagtggaagagac-3'<br>Reverse:5'- cctcccactcgctcccaacaaggagc-3'     |              |
| SMMHC ChIP        | Forward:5'- ctgcgcgggaccatatttagtcagggggag-3'<br>Reverse:5'- ctgggcgggagacaacccaaaaggccagg-3' |              |
| <i>c-fos</i> ChIP | Forward:5'- cggttccccctgcgctgcaccctcagag-3'<br>Reverse:5'- agaacaacagggaccggccgtggaacctg-3'   |              |
